1 **Time-resolved, integrated analysis of clonal genome evolution in parthenogenetic**  
2 **animals and in cancer**

3 Carine Legrand<sup>1,\*</sup>, Ranja Andriantsoa<sup>1</sup>, Peter Lichter<sup>2,3</sup>, Frank Lyko<sup>1</sup>

6 1 Division of Epigenetics, DKFZ-ZMBH Alliance, German Cancer Research Center, 69120 Heidelberg, Germany

7 2 Division of Molecular Genetics, German Cancer Research Consortium (DKTK), German Cancer Research  
8 Center (DKFZ), Im Neuenheimer ; Feld 280, 69120 Heidelberg, Germany

9 3 Molecular Precision Oncology, National Center for Tumor Diseases, Im Neuenheimer Feld 460, 69120  
10 Heidelberg, Germany

11 \* Corresponding author: E-mail address: [carine.legrand1@gmail.com](mailto:carine.legrand1@gmail.com)

## 12 **Abstract**

13 Clonal genome evolution is a key aspect for parthenogenetic species and cancer.  
14 While many studies describe precise landscapes of clonal evolution in cancer, few  
15 studies determine the underlying evolutionary parameters from molecular data, and  
16 fewer integrate theory with data. We derived theoretical results linking mutation rate,  
17 time, expansion dynamics, transition to recurrence, and survival. With this, we  
18 inferred time-resolved estimates of evolutionary parameters from mutation  
19 accumulation, mutational signatures and selection. Using this framework we traced  
20 the speciation of the rapidly emerging and invasive marbled crayfish to a time  
21 window between 1947 and 1996, which is consistent with biological records. In  
22 glioblastoma samples, we determined tumor expansion patterns, and tumor cell  
23 survival ratio at resection. Interestingly, our results suggest that the expansion pattern  
24 in the primary tumor is predictive of the progress and time to recurrence. In addition,  
25 tumor cell survival was always higher after resection and was associated with the  
26 expansion pattern and time to recurrence. We further observed selection events in a  
27 subset of tumors, with longer and purifying-only selection phases in recurrent tumors.  
28 In conclusion, our framework allowed a time-resolved, integrated analysis of key  
29 parameters in clonally evolving genomes, and provided novel insights into the  
30 evolutionary age of marbled crayfish and the progression of glioblastoma.

31

## 32 **Keywords**

33 Clonal genome evolution, Glioblastoma, Marbled crayfish, Integrative analysis, Mathematical  
34 modeling, Mutation rate, Selection, Mutational signatures, Tumor regrowth, Recurrence

## 35 **1 Introduction**

36 The evolution of genomes is shaped by many factors, among which the random  
37 accumulation of mutations over time plays a fundamental role [1, 2]. Far from being  
38 homogeneous, the probability of a mutation depends on many factors such as the  
39 genomic location [3], mutator alleles, local nucleotide context or mutagenic exposures  
40 [4]. Other genomic modifications include recombination in sexual reproduction, copy  
41 number variants and genomic rearrangements, gene transfers and hybridization. The  
42 capacity of any genomic modification to be inherited is partly stochastic, for instance  
43 through genetic drift [5], but can be favored or disfavored by positive or negative  
44 selection. Genome evolution could be observed historically via the mere measurement  
45 of phenotypes [6], and can now be determined precisely using high-throughput  
46 sequencing in parallel with experimental or cohort settings, such as mutation  
47 accumulation experiments, or the analysis of genetic trios [7, 8].

48 Clonal genome evolution is shaped by a more limited set of mechanisms. Mutation  
49 rate, selection and variant frequencies are key parameters, which determine the speed  
50 of evolution, and which function under the influence of selection pressure. While truly  
51 clonal genome evolution is rare in animals, it is recognized as a necessary  
52 diversification mechanism within an organism. Prominent examples include  
53 hematopoiesis and the immune response, which involves a large number of  
54 antibodies. Selection has also been studied in clonally evolving genomes [9, 10, 11,  
55 12]. In the context of tumor genome evolution, some studies have claimed that there  
56 can be a fully neutral evolution, at least in an established tumor [13, 9]. However, this  
57 is discussed controversially [9, 14, 15, 16, 17]. In particular, the usefulness of allele

58 frequency data to infer selection is still unclear. A limited number of studies addresses  
59 the inference of the timeline, using coalescent approaches [18], or using a  
60 probabilistic framework [19]. Few studies bring together the interplay of the mutation  
61 rate, selection and timeline in clonal genome evolution.

62 Cancer constitutes a disease based on clonal genome evolution, defined by somatic  
63 mutations, copy number variants, large-scale chromosome anomalies and germline  
64 risk variants. Recently, multiple-region sampling and emerging single-cell sequencing  
65 have provided an unprecedented view on tumor heterogeneity and cancer cell  
66 phylogenies [20, 21, 22, 23, 24, 25], while evolutionary game theory models shed  
67 light on the interaction of treatment with cancer evolution and allow treatment  
68 adaptation [26, 27]. In glioblastoma, a detailed analysis of tumor trajectories revealed  
69 a common tumorigenesis onset via specific chromosome gains or losses, while driver  
70 mutations occurred later and led to rapid growth [19]. Furthermore, mathematical  
71 modeling yielded time estimates for tumorigenesis ranging from 2 to 7 years before  
72 diagnosis [19].

73 Animal models have played a key role in understanding various aspects of tumor  
74 formation [28, 29, 30, 31]. Due to its particular mode of asexual reproduction, the  
75 marbled crayfish (*Procambarus virginalis*) represents an ideal animal model to study  
76 clonal genome evolution [32]. The animals are currently colonizing diverse habitats in  
77 a process that is associated with emerging genetic differentiation [33]. Interestingly,  
78 marbled crayfish appears to be an evolutionary young species, as their first emergence  
79 can be traced back to a specific event in 1995 [34]. If confirmed, this exceptionally  
80 young evolutionary age would represent a highly distinctive feature of the model  
81 system.

82 In this study, we aimed to establish a novel framework for analyzing clonal genome  
83 evolution in marbled crayfish and in cancer. To this end, we reformulated the  
84 dependence of mutation accumulation on variant allele frequency. We used the  
85 resulting equation to prove that selection is undecidable using variant allele frequency  
86 only, and to determine the links between the various parameters. We enriched this  
87 framework by integrating the non-synonymous to synonymous ratio and mutational  
88 signatures, in order to estimate selection, time course and tumor expansion  
89 parameters. We took care to evaluate uncertainties, using bootstrap. We applied our  
90 approach to the clonally evolving marbled crayfish and to recently published samples  
91 of primary and recurrent glioblastoma tumors [19]. For both, we provided a detailed  
92 view of mutation accumulation, selection, and time. For marbled crayfish, this  
93 resulted in a time estimate for its origin. In glioblastoma samples, we further  
94 determined tumor expansion parameters and tumor cell survival at the transition  
95 between the primary and recurrent tumors.

## 96 2 Results

### 97 Theoretical results on the mutation rate, allele frequency, growth and survival

98 To gain insights on the mutation rate in a clonal genome, we studied the theoretical  
99 properties of mutation accumulation  $dM$ , in relation to mutation frequency  $f$ . We first  
100 used the expression of  $dM$ :

$$101 \quad dM(t) = \mu(t) \cdot \pi(t) \cdot G \cdot 2 \cdot \omega(t) \cdot \gamma(t) \cdot N(t) \cdot dt, \quad (1)$$

102 where  $t$  is the time,  $\mu$  is the mutation rate,  $\pi$  is the ploidy,  $G$  is the genome size,  $\omega$  is  
103 the growth rate,  $\gamma$  is the survival rate and  $N$  is the number of animals, or cells in the  
104 context of cancer (for a detailed description of this expression, and for the  
105 demonstration of the following equations, see the Supplementary Demonstration). We  
106 stratified this expression to each subclone, since animal or cell lineages are likely to  
107 have different evolutionary parameters. Then, we introduced the observed mutation  
108 frequency  $f_i(t; t_r)$ . This is because  $f$  was observed not at occurrence, but at the time of  
109 retrieval or resection of a genomic DNA sample,  $t_r$ , and because a mutation in  
110 subclone  $i$  was then diluted among all subclones present at  $t_r$ . We obtained the  
111 following expression (2) for  $f_i(t; t_r)$ :

$$112 \quad f_i(t; t_r) = \frac{K_{i,r}}{N_i(t) \cdot \pi_i(t)}. \quad (2)$$

113 Equation (2) means that  $f$  is inversely proportional to  $N$  and to ploidy. The term  $K_{i,r}$  is  
114 a constant for subclone  $i$ , which accounts for the actual time of appearance of the  
115 mutation and for the dilution of subclone  $i$  in the sample (see assumptions in  
116 Supplementary Demonstration).

117 Next, we needed intermediate results about the increment of  $1/f$ ,  $d(1/f)$  and the  
118 increment of  $N$ ,  $dN$ . Note that we used the inverse allele frequency because this leads  
119 to simpler equations, and stays equivalent. Using calculus (see mathematical proof in  
120 Supplementary Demonstration), this led to expressions (3) and (4):

$$121 \quad dN_i = \omega_i(t) \cdot \gamma_i(t) \cdot N_i(t) \cdot dt \quad (3)$$

122 and

$$123 \quad d\left(1/f_i(t; t_r)\right) = \omega_i(t) \cdot \gamma_i(t) \cdot N_i(t) \cdot dt \cdot \pi_i. \quad (4)$$

124 Notably, we have made the assumption that ploidy is constant in order to obtain  
125 equation (4). As a result, using equations (1), (3) and (4), it was possible to obtain the  
126 dependence (5) of mutation accumulation on frequency  $f$ , in each subclone  $i$ :

$$127 \quad dM_i(t) = \mu_i(t) \cdot G \cdot K_{i,r} \cdot d\left(1/f_i(t; t_r)\right). \quad (5)$$

128 Finally, mutation accumulation overall was simply obtained as the sum of (5) in all  
129 subclones  $i$ . Because the observed frequencies  $f_i(t; t_r)$  are comparable between  
130 subclones, we used  $f$  in the following, while  $K_{i,r}$  continued to account for the time and  
131 proportion differences between subclones among the sample. This yielded the  
132 following equation (Supplementary Demonstration):

$$133 \quad dM(t) = \left(\sum_i \mu_i(t) \cdot K_{i,r}\right) \cdot G \cdot d(1/f). \quad (6)$$

134 Equation (6) states that mutation accumulation  $dM$  is proportional to  $d(1/f)$ .  
135 Furthermore,  $dM/d(1/f)$  can be constant, meaning that  $M(1/f)$  is linear, if the mutation  
136 rates  $\mu_i$  are constant. Conversely, when  $M(1/f)$  is linear, then the mutation rates are  
137 certainly, but not automatically, constant (Supplementary Demonstration). Equation

138 (6) also excludes any role of selection on  $M(1/f)$ , in agreement with [11, 12], and  
139 within the frame of assumptions (Supplementary Demonstration).

140 These theoretical results provided the foundation for calculating mutation rate  
141 variations from the curve  $M(1/f)$ , and time-resolved estimates, in *P. virginalis* and in  
142 glioblastoma samples in the following. In addition, these results allowed to derive the  
143 expressions between time, mutation rate, survival rate and growth rate in glioblastoma  
144 samples.

145

#### 146 **Mutation rate estimates and a timed coalescent tree for *P. virginalis***

147 In order to infer evolutionary parameters of the *P. virginalis* genome, we first  
148 assessed the mutation rate. We used whole-genome sequencing of a line of direct  
149 descendants from our laboratory colony of *P. virginalis*, that were sampled over a  
150 period of seven years (Fig. 1A). The mutation rate was calculated as the average  
151 number of de novo mutations in animals 34 and 35 as compared to animal 1, per  
152 nucleotide and per year. From these samples, we obtained a mutation rate equal to  
153  $\mu = 3.51 \cdot 10^{-8} / nt/y$  (95% confidence interval (CI):  $[1.67 \cdot 10^{-8}; 5.35 \cdot 10^{-8}] / nt/y$ ,  
154 range:  $[1.45 \cdot 10^{-10}; 5.47 \cdot 10^{-6}] / nt/y$ ). The mutation rate of *P. virginalis* is  
155 comparable to known mutation rates from other arthropods and falls between the  
156 human germline mutation rate and the somatic mutation rate of human cancers (Fig.  
157 1B).





174 (Heidelberg). Furthermore, samples from Madagascar formed a separate branch.  
175 Interestingly, Petshop 2 [32] was nested in the branch of animals from Madagascar.  
176 This is consistent with the notion that the Malagasy population was founded by an  
177 animal that was originally obtained from a German pet shop. Posterior probabilities  
178 (Fig. 1C, red annotations) indicate highly probable branching for all but the top  
179 coalescent event, which has 0.5206 probability. From this tree, the most recent  
180 common ancestor of the 13 animals occurred in 1988 (95% CI: [1986.1; 1989.8]). This  
181 is broadly consistent with the first documented appearance of *P. virginalis* in 1995  
182 [34].

183

#### 184 **Dynamics of mutation accumulation in *P. virginalis***

185 Knowing from theoretical results that mutation accumulation  $M$  as a function of  $(1/f)$   
186 informs on the mutation rate, we looked at the dynamics of  $M(1/f)$  in *P. virginalis*.  
187 The curve suggested that the mutation rate changed over time, with 4 phases defined  
188 by segmented regression (Fig. 2A;  $p=0.06$ ). For example, the mutation rate was  
189 reduced in phase 3, and increased in phase 4 (Fig. 2A).

190 Since selection (denoted  $s$ ) is not observable using  $M(1/f)$ , according to equation (6),  
191 we used the ratio of non-synonymous to synonymous mutations as a proxy for  $s$  (Fig.  
192 2B). This profile showed values close to 1 for phases 1 and 2, suggesting the absence  
193 of selection (Fig. 2B). During phases 3 and 4, we detected  $s$  values  $>1$ , and  $<1$ ,  
194 respectively (Fig. 2B), suggesting phases of positive and negative selection  
195 respectively.

196 We then used previously established clock-like mutational single-base signatures  
197 (SBS1 and SBS5) [36, 37, 18] as a proxy for the time course of mutation  
198 accumulation (Fig. 2C). We further assumed that the arrow of time from past to  
199 present corresponds with the arrow of increasing  $1/f$ . We calculated the integral of the  
200 clock-like components of mutation accumulation (see Methods for the details), which  
201 yielded a time course in arbitrary units (Fig. 2D). The slope of this curve is  
202 proportional to the mutation rate as a function of time. According to Fig. 2D, this  
203 mutation rate exhibited little variation. As a result, our framework allowed the  
204 analysis of mutations and selection dynamics at allele frequency resolution and at  
205 time resolution.

206

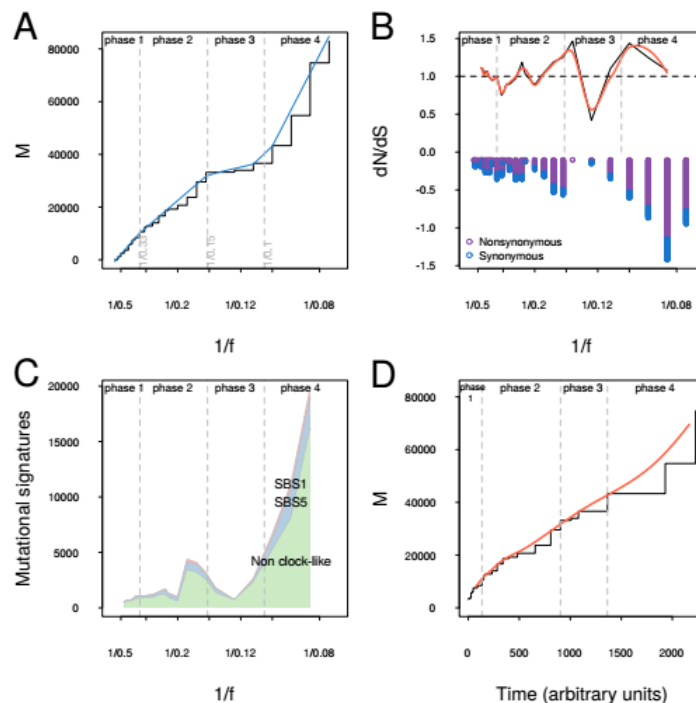

207

208 **Figure 2.** Mutation accumulation, selection and time course of *P. virginalis* genome

209 evolution. (A) Mutation accumulation as a function of the inverse allele frequency  $1/f$

210 (black) and phases from automated segmentation (breakpoints in grey, segments in  
211 blue). (B) Non-synonymous to synonymous ratio (dNdS). The smoothed ratio is  
212 shown in red. (C) Comparison of clock-like and non-clock-like mutational signatures.  
213 (D) Mutation accumulation as a function of time. Smoothened mutation accumulation  
214 is shown in red.

215

## 216 **Integrated analysis of *P. virginalis* genome evolution**

217 Since we had obtained two complementary sources of information on the time course  
218 of mutation accumulation in *P. virginalis* (coalescent and mutation rate profile), we  
219 integrated both approaches. Assuming that the mutation rate of the most recent past  
220 corresponded to the mutation rate calculated for animals 1, 34 and 35, we recalculated  
221 the coalescent times and thus obtained a consolidated coalescent tree (Fig. 3). The  
222 resulting time estimate for the most recent common ancestor was 1971  
223 [1946.9;1996.2] (95% CI) which is again consistent with the first report of the  
224 appearance of *P. virginalis* in 1995 [34].

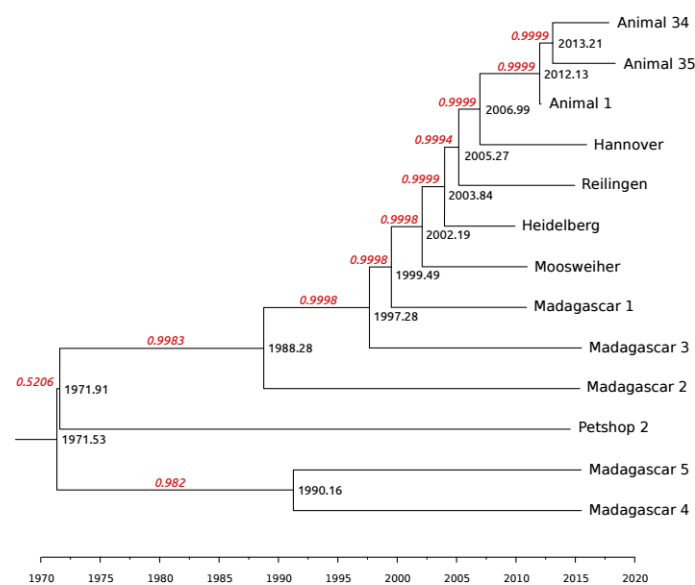

226 **Figure 3.** Coalescent tree of *P. virginialis* evolution after integration of the mutation  
227 rate profile. The tree, branch posterior probabilities, and coalescence times of animals  
228 1, 34 and 35 are unchanged, while the coalescence times of other animals were  
229 matched to the relative mutation rate profile derived from Fig.2D.

230

### 231 **Clonal evolution landscape in glioblastoma tumors**

232 Since glioblastoma is a high-grade glioma with systematic recurrence and poor patient  
233 survival, a better understanding of evolutionary parameters in this context would be of  
234 considerable importance. We therefore sought to apply our framework to a published  
235 set of whole-genome sequencing data of primary and recurrent glioblastoma tumors  
236 [19]. This study estimated in particular the age of primary tumors [19], allowing  
237 further integration in the following. Based on the curve  $M(1/f)$ , we generated  
238 mutation rate profiles (Fig. 4A, see Suppl. Fig. 1A for individual samples), which we  
239 further segmented into phases (Fig. 4A,  $p < 2.2 \cdot 10^{-16}$ ). The results indicated distinct  
240 variations in the mutation rate (Standard Deviation SD=63%, Inter-Quartile-Range  
241 IQR=133% relative to the mean mutation rate; Fig. 4A). Considering all primary  
242 tumor samples, SD varied from 54% to 141% (IQR: 71%-178%; Suppl. Table 2), and  
243 recurrent samples showed comparable variations (SD: 29%-139%, IQR: 29%-172%).

244 We next analyzed mutation selection using the dN/dS ratio. Taking confidence  
245 bounds into account, the results were compatible with neutral selection for most  
246 tumors (Fig. 4B, Suppl. Fig. 1B per sample). However, 11 primary tumor samples (2,  
247 3, 6, 18, 22, 24, 30, 31, 35, 40 and 42) showed evidence of negative (purifying)  
248 selection during brief intervals, for instance sample 35 (Suppl. Fig. 1B for sample 2,

249 1/f in [1/0.5; 1/0.3]). We also observed evidence for positive selection in two primary  
250 tumor samples (Samples 2 and 7, Suppl. Fig. 1B). Interestingly, 7 out of 9 recurrent  
251 tumor samples (samples 3, 4, 13, 19, 27, 30 and 35) underwent prolonged phases of  
252 negative selection (for example, sample 4, 1/f in [1/0.5; 1/0.1], Suppl. Fig. 1B), while  
253 2 samples (31 and 38) still exhibited short phases of negative selection. No recurrent  
254 tumor sample showed any significant phase of positive selection.

255 As a first step to determine the timeline of tumor evolution, we analyzed canonical  
256 tumor-associated single-base substitution (SBS) signatures [4]. More specifically, we  
257 compared the prevalence of the stable, clock-like SBS1 signature to the other, non  
258 clock-like SBS signatures (Fig. 4C, see Suppl. Fig. 1 for individual samples). This  
259 includes SBS5, which is non clock-like in glioblastoma according to [36] (Table1).  
260 This was confirmed in most samples analyzed, since there was little correlation  
261 between SBS1 and SBS5 ( $\rho_p = -0.060$  with IQR=0.143 in primary tumors;  $\rho_p = 0.067$ ,  
262 IQR=0.136 in recurrences). Surprisingly, the few samples under selection displayed  
263 larger correlation coefficients, suggesting that SBS5 might also be clock-like in this  
264 subset of samples (Suppl. Fig. 2,  $p = 0.01916$ ,  $\rho_p = 0.32$  in primary tumors;  $p = 0.02188$ ,  
265  $\rho_p = 0.52$  in recurrences). The non-clock like SBS signature prevalence was 3.334 (IQR  
266 = 0.477) fold higher than the clock-like SBS1 signature in the primary tumors (4.049  
267 fold higher, IQR= 1.074, in recurrences; Suppl. Table 2).

268 Using the information on the clock-like signature SBS1, and using equation (9)  
269 (Methods), we reconstructed  $M$  as a function of time (Fig. 4D, Suppl. Fig. 1D per  
270 sample), in arbitrary units. The slope of this curve is proportional to the mutation rate  
271 per time unit. Similar to the mutation rate per division in Fig. 4A, the mutation rate  
272 per time unit exhibited large variations, with SD in [22.8%; 117.9%] and IQR in

273 [26.5%; 142.4%] in primary tumors, and SD in [28.1%; 466.4%] and IQR in [20.6%;  
274 117.0%] in recurrent tumors (Suppl. Table 2). In conclusion, the evolutionary  
275 landscape of glioblastoma revealed notable variations in the mutation rate per division  
276 and per unit of time in all samples. Some evidence for selection was also detectable,  
277 with a putative association with the clock-like status of the SBS5 signature.

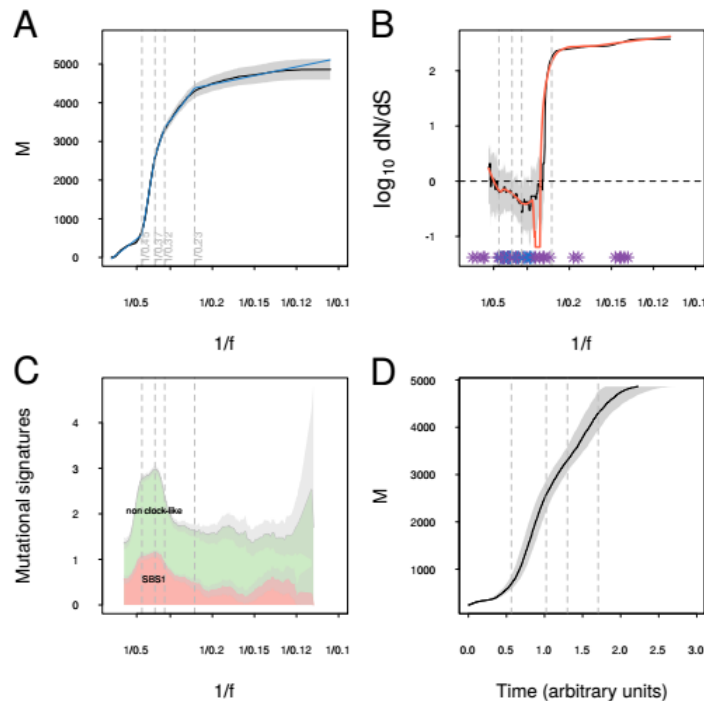

278

279 **Figure 4.** Mutation accumulation, selection and time dynamics of a representative  
280 glioblastoma tumor (patient 1, primary tumor). (A) Mutation accumulation as a  
281 function of the inverse allele frequency  $1/f$  (black) and phases from automated  
282 segmentation (breakpoints are indicated as dashed vertical lines, segments are  
283 indicated in blue). (B) Non-synonymous to synonymous ratio dN/dS. Purple and blue  
284 stars show non-synonymous and synonymous mutations, respectively. The  
285 smoothed ratio is shown in red. (C) Clock-like and non-clock-like mutational  
286 signatures. (D) Mutation accumulation as a function of time.

287

## 288 **Expansion parameters of the primary and recurrent tumors**

289 Using mutation accumulation as a function of  $1/f$  or time from Fig. 4A, D and  
290 equation (17) (Methods), we could reconstruct the product  $\omega\gamma N$  of the tumor  
291 parameters growth rate  $\omega$ , tumor cell survival rate  $\gamma$  and number of cells  $N$  (Fig. 5A).

292 This product corresponds to the expansion parameters of the tumor, hence yielding  
293 insights into the way how the tumor develops during the primary and recurrent  
294 phases, respectively (left and right panels of Fig. 5A). The curves  $\omega\gamma N$  for sample 1  
295 and other samples (Fig. 5A, Suppl. Fig. 3A for individual samples) displayed an  
296 overall increase in the primary tumor, except for samples 5 and 16. This increase was  
297 also observed in the recurrence phase for 29 samples out of 42, while 13 samples  
298 displayed an overall decrease. A decrease might be attributed to a declining growth  
299 rate  $\omega$  or tumor cell survival rate  $\gamma$ , while a decrease of  $N$  can be excluded in  
300 principle (unobservable). Furthermore,  $\omega\gamma N$  curves sometimes had a simple form with  
301 one local minimum, and sometimes a more complex pattern, with one or several  
302 additional local maxima and minima (Fig. 5A, Suppl. Fig. 3A for individual samples).

303 We then looked at a possible association between the patterns of the  $\omega\gamma N$  curve in the  
304 primary tumors, and the time to the recurrence (Fig. 5C). We first sorted curves into  
305 the following categories 1: convex, 2: stable, then convex, 3: double convex, 4:  
306 increasing (Suppl. Fig. 4A-D). The pattern of these curves in the primary tumors was  
307 associated to the differential time to recurrence, though this was non-significant after  
308  $p$ -values adjustment ( $p=0.04035$ ,  $p_{\text{adj}}=0.28245$ , Suppl. Fig. 4E, F). Further, while  
309 some patterns remained identical between the primary tumor and the recurrence,  
310 curves of type 2 preferably led to types 1 or 3 (Suppl. Fig. 4G,  $n=42$ ). Conversely,



311 type 3 never led to type 2. We then sought to confirm this manual analysis with a  
312 systematic approach, relying on segmentation and automatic detection of minima and  
313 maxima. Interestingly, we observed an association of the variance of time to  
314 recurrence with the presence of one local maximum ( $p=0.0181$ ,  $p_{\text{adj}}=0.0362$ ,  $n=20$ ). A  
315 similar trend, non-significant at 5% type I error level, appeared for the count of  
316 maxima during recurrence (Fig. 5D,  $p=0.0367$ ,  $p_{\text{adj}}=0.0734$ ,  $n=20$ ). The number of  
317 local maxima of  $\omega\gamma N$  curves was correlated between the primary tumor and  
318 recurrence, in the whole set of 42 samples ( $\rho_p= 0.34$ ). Hence, the patterns of  $\omega\gamma N$   
319 curves in the primary tumor are indicative of the expansion pattern in the recurrence,  
320 as well as the time to recurrence. The time to recurrence was 17.4 months (SD=12.9)  
321 in the subgroup with no maximum, suggesting a more favorable prognosis as  
322 compared to the subgroup with at least 1 maximum (8.7 months, SD=3.1), although  
323 this did not reach statistical significance ( $p=0.2485$ ,  $n=20$ ). The possible more  
324 favorable prognosis for the subgroup with no maximum was better explained by a  
325 larger variance (16.77 times higher if no maximum,  $p=9.343\times 10^{-5}$ ,  $p_{\text{adj}}=1.868\times 10^{-4}$ ,  
326 95% CI= [4.04 ; 239.06] ) than in the subgroup with 1 maximum or more.

327

### 328 **Tumor cell survival at the transition from primary to recurrent tumor**

329 Since the time difference between the resection of the primary tumor and the resection  
330 of the recurrence is known for a subset of samples [19], this allowed us to calibrate  
331 the time course from arbitrary units into real units (Eq. 10 in Methods, Fig. 5B, and  
332 Suppl. Fig. 3B per sample). Furthermore, the transition from the primary to the

333 recurrent tumor can be expressed formally (Eq. 11, Methods) and simplified using  
334 continuity assumptions (Methods), resulting in the following equation:

$$335 \quad \left(\frac{dM}{dt}\right)_P = \frac{(1/f)_P}{(1/f)_R} \cdot \frac{\gamma_P}{\gamma_R} \cdot \left(\frac{dM}{dt}\right)_R. \quad (7)$$

336 Equation (7) describes how mutation accumulation of primary tumors at resection  
337 (index P) and at the initiation of recurrence (index R), are linked by only their  
338 respective allele frequencies and tumor survival rate. An important assumption is that  
339 the mutation rate ( $\mu$ ) and the growth rate ( $\omega$ ) are constant between the primary tumor  
340 and the recurrence, based on the argument that these are intrinsic characteristics of the  
341 tumor, which are unlikely to change notably over a short time span. Conversely, in  
342 expression (7), the ratio for tumor survival rate in primary tumor to the recurrence,  
343  $\gamma_R/\gamma_P$ , cannot be taken as constant, since tumor cell survival changes drastically at  
344 resection and following treatment [19]. The ratio was therefore set to 300:1, based on  
345 the consideration that oxygen, room to expand and other resources supply might be  
346 much higher after resection of the primary tumor. Using this value, and since other  
347 parameters were known, we reconstructed the time course of mutation accumulation  
348 for the primary tumor (Fig. 5B, Eqs. 14, 15 in Methods), determining a progression  
349 time of 6 years for the primary tumor of sample 1, in agreement with published data  
350 [19]. This suggested that the chosen value for the tumor cell survival ratio was a  
351 reasonable assumption for this sample.

352 Using equation (7) in the reverse way, we determined the tumor survival ratio from  
353 time estimates. Previous analyses [19] indicated that the primary tumors could have  
354 emerged from 2 to 7 years before diagnosis. Using the values of 2 years and 7 years as

355 the lowest and highest limits for the time course of the primary tumor, we could  
356 determine a range for the value of the tumor survival ratio  $\gamma_R/\gamma_P$  for each individual  
357 sample (Eq. 16 in Methods, Fig. 5E, Suppl. Table 3). As a result, the lowest value of  
358 the ratio  $\gamma_R/\gamma_P$ , corresponding to a tumor emergence about 2 years before diagnosis,  
359 was always higher than 1, and had a median value of 27.8 (95% CI=[17.4; 54.0],  
360 n=20 samples). As for the upper bound for the range of  $\gamma_R/\gamma_P$  ratio, corresponding to  
361 tumor emergence 7 years before diagnosis, the median  $\gamma_R/\gamma_P$  ratio was 97.5 (95%  
362 CI=[60.9; 189.0]). These results indicated that tumor cell survival was higher at the  
363 start of the recurrence than at the end of the primary tumor growth. Notably, the  
364 variability between samples was considerable, with some samples being close to the  
365 unity ratio (samples 39, 40, 42), indicating similar tumor cell survival before and after  
366 resection. Not surprisingly,  $\gamma_R/\gamma_P$  ratios were associated to the time to recurrence  
367 (Fig. 5F, adjusted-R<sup>2</sup>=0.44,  $p=8.386\times 10^{-4}$ ,  $p_{\text{adj}}=1.258\times 10^{-3}$  for regression line 1,  
368 adjusted-R<sup>2</sup>=0.61,  $p=2.883\times 10^{-5}$ ,  $p_{\text{adj}}=8.649\times 10^{-4}$  for regression curve 2), with higher  
369  $\gamma_R/\gamma_P$  ratios corresponding to shorter time to recurrence. Further, the variance of  
370 ratios  $\gamma_R/\gamma_P$  was also associated to the number of local maxima in the primary tumors  
371 ( $p=0.01545$ ,  $p_{\text{adj}}=0.04635$ ). This further suggested that the expansion pattern of the  
372 primary tumor can predict the progression to recurrence.

373

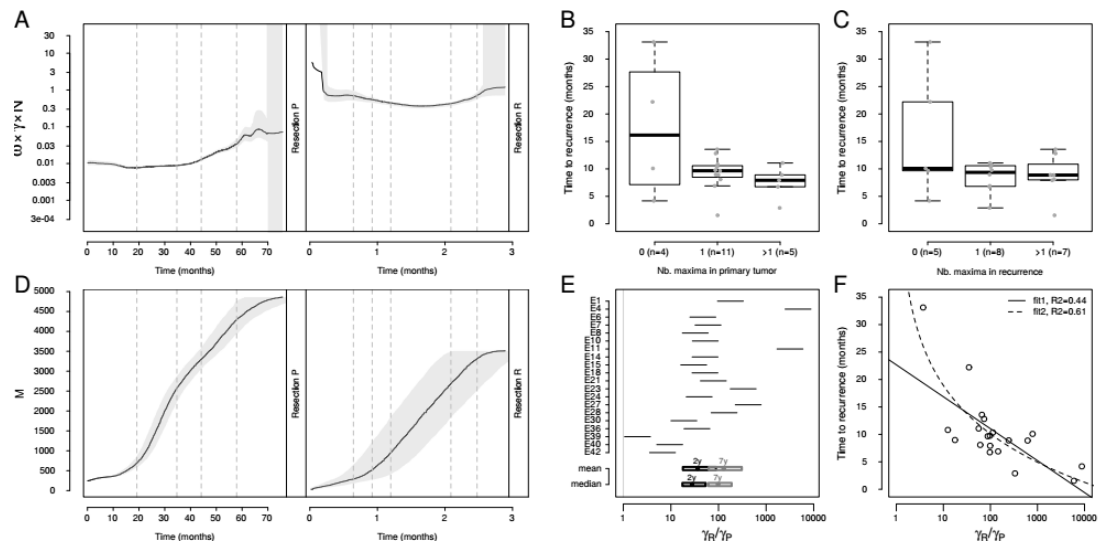

374

375 **Figure 5.** Transition of primary tumor to recurrent tumor for patient 1. (A) Dynamics  
 376 of growth rate  $\omega$  times tumor cell survival rate  $\gamma$  times number of cells  $N$ , for (P) the  
 377 primary tumor and (R) the recurrence. (B) Time to recurrence dependence on  $\omega\gamma N$   
 378 characteristics in the primary tumor, and (C) in the recurrence. (D) Time-resolved  
 379 mutation accumulation for primary tumor and recurrence. (E) Neoplastic cell survival  
 380 in recurrence relative to the primary tumor, denoted  $\gamma_R/\gamma_P$ , for the lower and higher  
 381 limits where tumor emergence dates back to 2 years, or to 7 years. (F) Dependence of  
 382 time to recurrence on the  $\gamma_R/\gamma_P$  ratio. Fit1 corresponds to a linear regression of time  
 383 versus  $\log_{10}(\gamma_R/\gamma_P)$ , with intercept=19.511 (standard error SE=2.544) and slope=-  
 384 5.819 (SE=1.455), fit2 corresponds to a linear regression of time versus  $\log_{10}(\log_{10}(\gamma_R/\gamma_P))$ ,  
 385 with intercept=18.922 (SE=1.806) and slope=-29.321 (SE=5.285).

### 386 **3 Discussion**

387 Our study suggests a key role of evolution dynamics in the primary tumor and of  
388 tumor cell survival at resection, in glioblastoma. This and other aspects examined in  
389 this study were brought to light thanks to the intimate combination and integration of  
390 theoretical results with molecular data, in order to determine detailed and time-  
391 resolved characteristics of clonal genome evolution. In that, our study is the first to  
392 demonstrate the viability and strength of such a comprehensive approach. Replication  
393 and extension studies should help complement our results with additional insights and  
394 potential clinical applications.

395 Our study also validated the clonal genome model *P. virginalis*, with a base mutation  
396 rate for this animal of  $3.51 \cdot 10^{-8}/nt/y$ , close to the mutation rate observed in human  
397 somatic evolution in healthy tissues and in cancer, though some discrepancies may  
398 arise because of differentiation, adaptation timescales, and environmental switches  
399 [38]. This model was instrumental in developing our approach, and further  
400 demonstrated the utility of integrating different sources of information, which yielded  
401 a refined estimated time to the most recent common ancestor in 1971 (95%  
402 confidence limits: [1946.9;1996.2]), in agreement with first reports of this animal in  
403 1995 [34], and consistent with a very young evolutionary age of the species.

404 The expansion profile in the primary tumors and also the tumor cell survival ratio  
405 around resection, were both associated with the time to recurrence, and with the  
406 expansion profile during recurrence. This suggests a predictive value for evolutionary

407 parameters in the primary tumor, with respect to timing and expansion characteristics  
408 during recurrence. Logically, earlier diagnosis should in principle prevent the primary  
409 tumor from reaching a complex expansion profile and hence lead to a more favorable  
410 prognosis. Few studies have proposed biomarkers or a mechanistic explanation based  
411 on clonal evolution [39, 40, 41, 42, 43, 44], so that a potential prognostic biomarker  
412 based on the expansion profile would be valuable.

413 Interestingly, tumor cell survival was systematically higher in the recurrence. This  
414 supports the notion that tumor regrowth is more aggressive after surgical resection of  
415 primary glioblastoma tumors [45, 46], possibly because resection-induced astrocyte  
416 injury can support faster growth [46]. Additionally, space and oxygen can promote  
417 tumor regrowth [47, 48, 49], while a stronger immune response after resection would  
418 reduce it. In this regard, our large range of tumor cell survival rates might reflect the  
419 different balances between these (and other) parameters.

420 The impossibility to observe selection using allele frequency alone had been  
421 suggested before [11, 12], and is shown here, in the frame of minimal, reasonable  
422 assumptions [50, 51, 52]. This prompted us to use the dNdS ratio instead. While most  
423 glioblastoma samples showed no or little signs of selection, about 25% of samples did  
424 exhibit short (in primary tumors) or longer (in recurrences) phases of selection. This  
425 provides an important complement to recent studies, that have either claimed a major  
426 role of selection [3] or its complete absence [13, 9]. These seemingly contradictory  
427 findings may be explained by the pace of tumor growth. In slowly growing  
428 populations, the genome is shaped by random drift and selection [50, 51]. Conversely,  
429 faster growth rates render random drift negligible [50, 51] and selection less

430 observable [53]. This indicates that the observed presence of selection in a subset of  
431 samples might correspond to phases of slower tumor growth.

432 We further noted variations of the mutation rate, both in *P. virginalis* and in  
433 glioblastoma. This supports the argument that the mutation rate should not be  
434 considered constant [1, 54, 55]. Known mechanisms can explain these variations,  
435 including a temporarily more pronounced effect of error-prone mechanisms, hypoxia-  
436 induced mutagenesis, or transcription-associated mutagenesis [1, 56]. Interestingly,  
437 the mutational signature SBS5 exhibited a correlation with the clock-like, m5C-  
438 deamination related signature SBS1, in a subset of glioblastoma samples under  
439 selection. While this could be a spurious finding, it could also help to understand the  
440 etiology of SBS5.

441 It will be important to validate the prognostic value of evolution characteristics in  
442 independent tumor datasets. In addition, since our characterization relies on the entire  
443 tumor, with subclones inherently considered in the mathematical framework, it would  
444 be interesting to complement the analysis with local biopsies or on the single-cell  
445 level. Assuming that complex evolution patterns in the primary tumor are explained  
446 by its adaptation, this could shed light on the identity of responsible subclones or  
447 interaction of subclones, and possibly provide novel mechanistic explanations. Also,  
448 integration of multi-omics datasets could help disentangle the individual roles of  
449 tumor expansion parameters and the connections between genotypes and phenotypes.

450 In conclusion, our integrated analysis of theoretical results, mutation accumulation,  
451 dNdS ratio and mutational signatures revealed a detailed picture of the expansion

452 dynamics, time course and survival of tumor cells in glioblastoma samples, and  
453 validated the marbled crayfish as a useful animal model for studying clonal genome  
454 evolution. In particular, our results suggested that tumor dynamics as well as the time  
455 to recurrence were predicted by the parameters of the primary tumor, with a longer  
456 time to recurrence, and hence a longer patient survival in the subgroup with the least  
457 complex dynamics. Remarkably, survival of neoplastic cells was shown to be  
458 systematically higher after resection than before resection, and a lower survival of  
459 neoplastic cells in the recurrence was associated with a longer time to recurrence.



## 460 **4 Methods**

461 ***Procambarus virginalis* samples.** Freshwater crayfish samples from [32] were used.  
462 Additionally, samples from animal 1, Madagascar 1 sample and Moosweiher sample  
463 were resequenced. Animal 1 corresponds to the lab strain, acquired from a pet shop  
464 (Suppl. Table 1). New genomic DNA samples were taken from animal 34 and animal  
465 35, which, as animal 1, also correspond to lab strains animals, and which are direct  
466 offsprings of animal 1. These new samples were prepared and submitted for whole  
467 genome sequencing following the protocol already described. The genealogy and  
468 birth date of animals were retrieved from laboratory records and field records (Suppl.  
469 Table 1). Sequence data was trimmed using Trimmomatic v0.32 (settings:  
470 LEADING:3 TRAILING:3 SLIDINGWINDOW:4:20 MINLEN:40, adapter  
471 sequence: TruSeq3-PE). Next, trimmed data was mapped to Pvir genome assembly  
472 v04, using bowtie2 (v2.2.6, setting: --sensitive). Aligned reads were sorted, cleared  
473 from duplicates, sorted and indexed using samtools. Subsequently, variant calling was  
474 performed using freebayes v0.9.21-g7dd41db (parameters: --report-all-haplotype-  
475 alleles -P 0.7 -p 3 --min-mapping-quality 30 --min-base-quality 20 --min-coverage 6  
476 --report-genotype-likelihood-max).

477 **Glioblastoma Multiforme samples.** The glioblastoma primary and recurrent tumor  
478 samples correspond to the WGS cohort already described in Koerber *et al.* (2019). In  
479 particular, summary information can be found in supplementary table 1 of [19]. After  
480 approval of the research project, access to the SNP data of primary and recurrent  
481 tumor samples, as well as time to recurrence when available, was granted.

482 **Study of mutation accumulation.** An infinitesimal increment of mutations was  
483 defined from the mutation rate, ploidy, cell survival, growth and number of cells:

484 
$$dM(t) = \mu(t) \cdot \pi(t) \cdot G \cdot 2 \cdot \omega(t) \cdot \gamma(t) \cdot N(t) \cdot dt. \quad (8)$$

485 We have stratified this expression for each subclone (see Supplementary  
486 Demonstration for details about this and for the proof of each of the following steps).

487 We have then determined the relationship between the observable allele frequency of  
488 a mutation, which is the one obtained after sequencing and SNP calling, and the  
489 features of the subclone where this mutation appeared. Next, we have determined a  
490 formula for the increment of the number of cells  $dN$  and for the increment of inverse  
491 allele frequency  $d(1/f)$ . For this latter increment, we have made the assumption that  
492 ploidy was constant. Using intermediate equations, we could then deduce the  
493 mutation accumulation  $dM_i$  as a function of inverse allele frequency  $1/f_i$ , in each  
494 subclone  $i$ . Finally, the equation for mutation accumulation over all subclones  $dM$  was  
495 obtained by summing the individual contributions  $dM_i$  of each subclone.

496 **Mutation annotation and dNdS ratio.** Mutations were annotated as synonymous or  
497 non-synonymous (including splice or stopgain mutations) using SNPdat v1.0.5. The  
498 dNdS ratio was calculated as the quotient of non-synonymous mutations by  
499 synonymous mutations in a sample, divided by the average quotient in the full  
500 genome. The average quotient of non-synonymous to synonymous in humans was  
501 taken equal to 3.34951759 (hg19).

502 **Mutational signatures.** Mutational signatures for human subjects were downloaded  
503 from the COSMIC database (<https://cancer.sanger.ac.uk/signatures/> ; version 3.1 as of  
504 11.08.2020). Mutation data was binned using a bin half-width of 0.5 on the inverse  
505 allele frequency. Exposure of binned data was determined using R 3.5.2 with package  
506 YAPSA (version 1.8.0). Uncertainty on mutational signatures were determined by  
507 bootstrap resampling of mutations and generation of the binned data and YAPSA  
508 exposures on the resampled data. We have used 1000 bootstrap replicates as a  
509 compromise between an ideally larger (1M) number of replicates, and reasonable  
510 computing time. Large mutation sets (>100,000 mutations) were subsampled to  
511 50,000-60,000 mutations for the bootstrap analysis. Mean, median, percentiles and  
512 95% confidence bounds were determined using the resulting bootstrap distribution.

513 **Time course.** We have utilized clock-like mutational signatures SBS1 and SBS5 as a  
514 surrogate indicator of time (for glioblastoma, SBS1 only, in agreement with [36]). We  
515 obtained an increment of time by integrating the number of mutations which are  
516 clock-like over an increment of inverse allele frequency  $1/f$ . Considering that the  
517 number of mutations is also proportional to the number of cells in the tumor, we  
518 further wanted to standardize the count of clock-like mutations, by dividing this count  
519 by the number of cells  $N$ . Since  $1/f$  is proportional to  $N$  [9], we multiply by  $f$  instead of  
520 dividing by  $N$ . This yielded the formula for determining time  $t$  from integration of  
521 clock-like mutational signatures  $\theta$  over the range of the inverse allele frequency  $1/f$ :

$$522 \quad t_{a.u.} = \int_{(1/f)_{min}}^{(1/f)_{max}} \theta \cdot f \cdot d(1/f). \quad (9)$$

523 This evaluation of time is in arbitrary units (a.u.). For some glioblastoma samples, the  
524 time-to-relapse is known. We have used this time-to-relapse, denoted here  $\tau$ , to  
525 calibrate the time course in the recurrence to real units, in months:

$$526 \quad t = \tau \cdot t_{a.u.} / \max(t_{a.u.}). \quad (10)$$

527 In order to propagate the time calibration to the time course of the primary tumor, it  
528 was necessary to determine a practicable link between these two phases. To this aim,  
529 we have looked at the ratio of mutation accumulation between the end of primary  
530 tumor (subscripted 'P', taken as the last 5% time points) and start of recurrence  
531 (subscript 'R', first 5% time points). The passage from primary tumor to recurrence  
532 effectively corresponds to the instant of primary tumor resection. Using equation (X)  
533 above, this ratio could be written as follows:

$$534 \quad \frac{(dM/dt)_P}{(dM/dt)_R} = \frac{(\mu \cdot \pi \cdot G \cdot 2 \cdot \omega \cdot \gamma \cdot N)_P}{(\mu \cdot \pi \cdot G \cdot 2 \cdot \omega \cdot \gamma \cdot N)_R}. \quad (11)$$

535 The constants normalized out of this ratio. Further, we have assumed that ploidy  $\pi$ ,  
536 mutation rate  $\mu$  and division rate  $\omega$  stay constant over this short period, because they  
537 are inherent features of the tumor cells. However, the count of tumor cells  $N$  wasn't  
538 constant. We expressed it as the ratio of inverse allele frequency, since it is  
539 proportional to  $N$ :

$$540 \quad \frac{N_P}{N_R} = \frac{(1/f)_P}{(1/f)_R}. \quad (12)$$

541 Equation (12) is perturbed in practice by mutations which are not de novo in the  
542 recurrence, but inherited from the primary tumor. Ideally, only de novo mutations  
543 should be included to perform this calculation. Finally, the survival rate of tumor  
544 cells,  $\gamma$ , also couldn't be considered constant, and we had no indicator or surrogate for  
545 this value. For this reason we have set an arbitrary value for the survival at end of  
546 primary tumor, relatively to the start of recurrence,  $\gamma_P/\gamma_R = 1/300$ .

547 Using the above,  $dM/dt$  at end of primary tumor could be determined:

548 
$$\left(\frac{dM}{dt}\right)_P = \frac{(1/f)_P}{(1/f)_R} \cdot \frac{\gamma_P}{\gamma_R} \cdot \left(\frac{dM}{dt}\right)_R. \quad (13)$$

549 Since the number of mutations at end of primary tumor was known, and since the rest  
550 of parameters was known, the time in real units at the end of primary tumor could be  
551 calculated as follows:

552 
$$dt_P = \frac{(dM)_P}{\frac{(1/f)_P}{(1/f)_R} \cdot \frac{\gamma_P}{\gamma_R} \cdot \left(\frac{dM}{dt}\right)_R}. \quad (14)$$

553 Finally, the time course of the primary tumor in arbitrary units was scaled to real  
554 units, using the known point at the end of primary tumor:

555 
$$dt = dt_{a.u.} \cdot \frac{dt_P}{dt_{a.u.,P}}. \quad (15)$$

556 **Tumor cell survival ratio.** For time calibration to real units, we have made an  
557 assumption on tumor cell survival ratio  $\gamma_R/\gamma_P$  to determine real time in the primary  
558 tumor. To quantify the survival ratio, we have proceeded the other way around, using  
559 an assumption on the time course in the primary tumor, in order to determine the ratio  
560  $\gamma_R/\gamma_P$ . We have taken the assumption that the time between the most recent common  
561 ancestor (TMRCA) lies either 2 years or 7 years before primary tumor resection.  
562 These durations correspond to the shortest and longest time spans from Koerber et al.  
563 (2019). The calculation of the tumor cell survival ratio was done using the following  
564 equation:

$$565 \quad \frac{\gamma_R}{\gamma_P} = \frac{\left(\frac{dM}{dt}\right)_R}{\frac{(1/f)_R}{(1/f)_P} \cdot \left(\frac{dM}{dt}\right)_P}. \quad (16)$$

566 **Tumor expansion profile.** From equation (4) in Suppl. Demonstration, time and  $1/f$   
567 are proportional, with modulators growth rate  $\omega$ , tumor cell survival rate  $\gamma$ , and  
568 number of tumor cells  $N$ :

$$569 \quad d(1/f) \propto \omega \cdot \gamma \cdot N \cdot dt. \quad (17)$$

570 As a consequence, dividing increment  $d(1/f)$  by increment  $d(t)$  yielded the product  
571  $\omega\gamma N$ , which we denoted expansion profile (or pattern).

572 **Expansion profile analysis.** We first noticed and identified 4 curve categories by  
573 visual inspection (Suppl. Fig. 4), and next manually classified expansion curves to  
574 one of these 4 categories. For the automated procedure, curve segments for  $M(1/f)$   
575 were determined using R package `segmented` (v1.1-0), using objective  $R^2$  set to  
576 0.9995, and using the lowest number of segments which attained this objective,  
577 limited to a maximum of 20 segments. For curves  $\omega\gamma N(t)$ , the number of segments  
578 was tailored to allow annotation of most visible local minima or maxima. The count  
579 of extrema was then derived from the changed slope from one segment to the next.  
580 This count had to be further curated in a subset of samples.



581 **Mutation rate of *Procambarus virginalis*.** Mutation accumulation between animals 1  
582 and its offsprings animals 34 and animals 35 was used to calculate the mutation rate.  
583 SNP variants were examined in terms of quality and coverage (Suppl. Fig. 5). Quality  
584 at least 35 and coverage at least 50 and no more than 200 was retained for the main  
585 estimate of the mutation rate. Coverages 200 and higher exhibited altered SNP  
586 distribution (Suppl. Fig. 5), and have thus been excluded because possibly  
587 corresponding to a distinct part of *P. virginalis* genome (possibly highly repetitive  
588 and variable domains). For the minimum estimate of the mutation rate, we have used  
589 more stringent quality filters, with quality >39 and coverage in [50-200]. For the  
590 maximal estimate of the mutation rate, we have used relaxed quality filters, with  
591 quality >35 and coverage in [25-200]. Subsequently, the mutation rate per nucleotide  
592 per year was calculated as the count of biallelic mutated nucleotides in animal 34  
593 (respectively, animal 35) as compared to animal 1, divided by the count of nucleotides  
594 in the triploid genome of *P. virginalis*, and divided by the period of time, in years,  
595 between animal 1 and animal 34's births (respectively, birth date of animal 35). We  
596 have made a thorough uncertainty analysis. We first determined standard deviation on  
597 the count of mutations observed assuming that this count follows a Poisson  
598 distribution of new mutations (genotyping uncertainty). Second, we used a third of the  
599 total uncertainty on time of birth as the standard deviation for the date of birth. Third,  
600 we calculated the standard deviation between animal 34 and animal 35's mutation  
601 rates. Finally, we combined these three standard deviation components using a  
602 quadratic sum (since considering that at least two of these variance components  
603 follow a normal distribution).

604

605 **Coalescent time.** Time to most recent common ancestor for *P. virginalis* samples was  
606 determined using Bayesian evolutionary analysis by sampling trees (BEAST v1.10.4 ;  
607 Note: at the time of download and installation, BEAST2 didn't offer any additional  
608 model, but rather a multiplatform component which wasn't needed here). Mutation  
609 data with quality >35 and coverage depth >15 was used in this analysis (a coverage  
610 cutoff of 25 was not justified here because samples other than animals 1, 34 and 35  
611 possessed a notably lower average sequencing depth). Samples birth dates were used  
612 as tip dates. Further BEAST parameters used were: simple substitution model with  
613 estimated base frequencies, strict clock, skyride coalescent prior, Markov chain  
614 Monte Carlo length of 10M. The resulting dates were rescaled to match the exact time  
615 durations known for animals 1, 34 and 35. We further modulated the coalescent time  
616 with the mutation rate profile in replacement of the strict clock, using the following  
617 equation:

618 
$$t_0 = t_f - \frac{1}{\mu_r} \cdot (t_f - t_{b,0}). \quad (18)$$

619 In this equation,  $t_f$  is the end timepoint,  $t_0$  is the initial time point, here the time to  
620 most recent common ancestor,  $t_{b,0}$  is the initial time point before rescaling and  $\mu_r$  is  
621 the temporal mean of the mutation rate profile divided by the mutation rate at the end  
622 timepoint. The mutation rate profile was taken as the slope of  $dM/d(1/f)$ , in agreement  
623 with equation (6). For the first time point, the temporal mean could be calculated  
624 immediately, using the full profile, but for intermediate coalescent timepoints  $t_i$ , the  
625 time interval where the temporal mean should be calculated was not known  
626 beforehand. Because of that, we first used the full mutation rate profile to estimate  $t_{i,1}$ .  
627 Then, we proceeded by iterations, using  $t_{i,1}$  to recalculate  $\mu_r(t_{i,1})$  which in turn was  
628 used to determine  $t_{i,2}$ . We repeated these steps ten times, which ensured  
629  $|t_{i,10} - t_{i,9}| < 0.001$  for all  $i$ .

630

631 **Statistical analyses.** R [57] was used for all statistical analyses, as well as for  
632 bootstrap calculations (except a few instances carried out in Python [58] and summary  
633 statistics mean, median, quantiles). All statistical tests were unpaired and two-sided;  
634 with the level of significance set at 5%. Segmentation p-values were extracted from  
635 the output of R package segmented. Correlation coefficients between SBS1 and SBS5  
636 were determined using Pearson method, and summarized by their median and IQR  
637 over the 42 samples, and a comparison between the group under selection or not was  
638 made using a Wilcoxon rank-sum test. A differential time to recurrence between  
639 subgroups in the manually sorted  $\omega\gamma N$  curves was assessed using a wilcoxon rank-  
640 sum test against curve type 3. Differences on the time to recurrence in the systematic  
641 analysis was explored by analysis of variance against the number of maxima in the  
642 primary tumors and in the recurrence, with Bonferroni adjustment of  $p$ -values. The  
643 difference of time to recurrence between subgroups based on the number of maxima  
644 in the primary tumors was further explored using a non-parametric wilcoxon test and  
645 using a F-test of comparison of variances. A possible association of the  $\gamma_R/\gamma_P$  ratio  
646 (n=20) with the pattern of  $\omega\gamma N$  curves was investigated using a F-test of comparison  
647 of variances. A possible association of the  $\gamma_R/\gamma_P$  ratio with the time to recurrence was  
648 assessed with a linear regression, using a simple or double  $\log_{10}$  scale on the  $\gamma_R/\gamma_P$   
649 ratio, with Bonferroni adjustment.

650

#### 651 **Data availability**

652 Newly sequenced marbled crayfish data have been deposited as a National Center for  
653 Biotechnology Information BioProject (to be completed ; accession number XXXX),

654 while reanalysed data is accessible as a BioProject as well (accession number  
655 PRJNA356499). Glioblastoma data corresponds to accession number :  
656 EGAS00001003184 at the European Genome-phenome Archive (EGA).

657

### 658 **Acknowledgements**

659 We would like to thank Verena Körber and Thomas Höfer for helpful discussions and  
660 for providing data, and Julian Gutekunst for discussions about the methods. We would  
661 also like to thank Katharina Hanna for data and for crayfish culture, and Sina Tönges  
662 for sample processing. We further acknowledge the German Cancer Research Center  
663 Genomics and Proteomics Core Facility for whole-genome sequencing.

664

### 665 **Authors contributions**

666 C.L. and F.L. conceived and designed the analysis. R.A. carried out fieldwork and  
667 contributed to the conceptual development, P.L. contributed data, C.L. developed the  
668 theory and performed the analysis, C.L. and F.L. wrote the manuscript.

669

### 670 **Competing interests**

671 The authors declare no competing interests.

672

## 673 **References**

- 674 [1] Lynch, M., et al. Genetic drift, selection and the evolution of the mutation rate. *Nat. Rev. Genet.*,  
675 **17**, 704–714 (2016).
- 676 [2] Kent, D. G., and Green, A. R. Order matters: The order of somatic mutations influences cancer  
677 evolution. *CSH. Perspect. Med.*, **7**, a027060 (2017).
- 678 [3] Martincorena, I., et al. Universal patterns of selection in cancer and somatic tissues. *Cell*, **171**,  
679 1029–1041.e21 (2017).
- 680 [4] Alexandrov, L. B., et al. Signatures of mutational processes in human cancer. *Nature*, **500**, 415–  
681 421 (2013).
- 682 [5] Tataru, P., Simonsen, M., Bataillon, T., and Hobolth, A. Statistical inference in the wright-fisher  
683 model using allele frequency data. *Syst. Biol.*, **66**, e30–e46 (2017).
- 684 [6] Benton, M. L., et al. The influence of evolutionary history on human health and disease. *Nat.*  
685 *Rev. Genet.*, **22**, 269–283 (2021).
- 686 [7] Martincorena, I., and Campbell, P. J. Somatic mutation in cancer and normal cells. *Science*, **349**,  
687 1483–1489 (2016).
- 688 [8] Katju, V., and Bergthorsson, U. Old trade, new tricks: Insights into the spontaneous mutation  
689 process from the partnering of classical mutation accumulation experiments with high-  
690 throughput genomic approaches. *Genome Biol. Evol.*, **11**, 136–165 (2019).
- 691 [9] Williams, M. J., Werner, B., Barnes, C. P., Graham, T. A., and Sottoriva, A. Identification of  
692 neutral tumor evolution across cancer types. *Nat. Genet.*, **48**, 238–244 (2016).
- 693 [10] Rosen, Z., and Bhaskar A, Roch S, S. Y. Geometry of the sample frequency spectrum and the  
694 perils of demographic inference. *Genetics*, **210**, 665–682 (2018).
- 695 [11] Niida, A., Iwasaki, W. M., and Innan, H. Neutral theory in cancer cell population genetics. *Mol.*  
696 *Biol. Evol.*, **35**, 1316–1321 (2019).
- 697 [12] Bozic I, Paterson C1, W. B. On measuring selection in cancer from subclonal mutation  
698 frequencies. *Plos Comput. Biol.*, **15**, e1007368 (2019).
- 699 [13] Sottoriva, A., et al. A big bang model of human colorectal tumor growth. *Nat. Genet.*, **47**, 209–  
700 216 (2015).

- 701 [14] Noorbakhsh, J., and Chuang, J. H. Uncertainties in tumor allele frequencies limit power to infer  
702 evolutionary pressures. *Nat. Genet.*, **49**, 1288–1289 (2017).
- 703 [15] Tarabichi, M., et al. Neutral tumor evolution ? *Nat. Genet.*, **50**, 1630–1633 (2018).
- 704 [16] Balaparya, A., and De, S. Revisiting signatures of neutral tumor evolution in the light of  
705 complexity of cancer genomic data. *Nat. Genet.*, **50**, 1626–1628 (2018).
- 706 [17] McDonald, T. O., Chakrabarti, S., and Michor, F. Currently available bulk sequencing data do  
707 not necessarily support a model of neutral tumor evolution. *Nat. Genet.*, **50**, 1620–1623 (2018).
- 708 [18] Baez-Ortega, A., et al. Somatic evolution and global expansion of an ancient transmissible  
709 cancer lineage. *Science*, **365**, eaau9923 (2019).
- 710 [19] Körber, V., et al. Evolutionary trajectories of idhwt glioblastomas reveal a common path of early  
711 tumorigenesis instigated years ahead of initial diagnosis. *Cancer Cell*, **35**, 692–704.e12 (2019).
- 712 [20] Gerlinger, M., et al. Intratumor heterogeneity and branched evolution revealed by multiregion  
713 sequencing. *N. Engl. J. Med.*, **366**, 883–892 (2012).
- 714 [21] Sun, R., et al. Between-region genetic divergence reflects the mode and tempo of tumor  
715 evolution. *Nat. Genet.*, **49**, 1015–1024 (2017).
- 716 [22] Werner, B., et al. Measuring single cell divisions in human tissues from multi-region sequencing  
717 data. *Nat. Commun.*, **11**, 1035 (2020).
- 718 [23] Lee-Six, H., et al. Population dynamics of normal human blood inferred from somatic mutations.  
719 *Nature*, **561**, 473–478 (2018).
- 720 [24] Nam, A. S., Chaligne, R., and Landau, D. A. Integrating genetic and non-genetic determinants of  
721 cancer evolution by single-cell multi-omics. *Nat. Rev. Genet.*, **22**, 3–18 (2021).
- 722 [25] Ellsworth, D. L., et al. Single-cell sequencing and tumorigenesis: improved understanding of  
723 tumor evolution and metastasis. *Clin. Transl. Med.*, **6**, 15–15 (2017).
- 724 [26] Basanta, D., Simon, M., Hatzikirou, H., and Deutsch, A. Evolutionary game theory elucidates  
725 the role of glycolysis in glioma progression and invasion. *Cell proliferat.*, **41**, 980–987 (2008).
- 726 [27] Zhang, J., Cunningham, J. J., Brown, J. S., and Gatenby, R. A. Integrating evolutionary  
727 dynamics into treatment of metastatic castrate-resistant prostate cancer. *Nat. Comm.*, **8**, 1816  
728 (2017).
- 729 [28] Kersten, K., de Visser, K. E., van Miltenburg, M. H., and Jonkers, J. Genetically engineered

- 730 mouse models in oncology research and cancer medicine. *EMBO Mol. Med.*, **9**, 137–153 (2017).
- 731 [29] Blanpain, C. Tracing the cellular origin of cancer. *Nat. Cell Biol.*, **15**, 126–134 (2013).
- 732 [30] Miles, W. O., Dyson, N. J., and Walker, J. A. Modeling tumor invasion and metastasis in  
733 *drosophila*. *Dis. Model. Mech.*, **4**, 753–761 (2011).
- 734 [31] Kirienko, N. V., Mani, K., and Fay, D. S. Cancer models in *caenorhabditis elegans*. *Dev.*  
735 *Dynam.*, **239**, 1413–1448 (2011).
- 736 [32] Gutekunst, J., et al. Clonal genome evolution and rapid invasive spread of the marbled crayfish.  
737 *Nat. Ecol. Evol.*, **2**, 567–573 (2018).
- 738 [33] Maiakovska, O., et al. Genome analysis of the monoclonal marbled crayfish reveals genetic  
739 separation over a short evolutionary timescale. *Commun. Biol.*, **4**, 74 (2021).
- 740 [34] Lyko, F. The marbled crayfish (decapoda: Cambaridae) represents an independent new species.  
741 *Zootaxa*, **4363**, 544–552 (2017).
- 742 [35] Drummond, A., and Rambaut, A. Beast: Bayesian evolutionary analysis by sampling trees. *BMC*  
743 *Evol. Biol.*, **7**, 214 (2007).
- 744 [36] Alexandrov, L. B., et al. Clock-like mutational processes in human somatic cells. *Nat. Genet.*,  
745 **47**, 1402–1407 (2015).
- 746 [37] Petljak, M., et al. Characterizing mutational signatures in human cancer cell lines reveals  
747 episodic apobec mutagenesis. *Cell*, **176**, 1282–1294.e20 (2019).
- 748 [38] Merlo, L. M., Pepper, J. W., Reid, B. J., and Maley, C. C. Cancer as an evolutionary and  
749 ecological process. *Nat. Rev. Cancer*, **6**, 924–935 (2006).
- 750 [39] Wang, J., et al. Clonal evolution of glioblastoma under therapy. *Nat. Genet.*, **48**, 768–776 (2016).
- 751 [40] Desai, P., et al. Somatic mutations precede acute myeloid leukemia years before diagnosis. *Nat.*  
752 *Med.*, **24**, 1015–1023 (2018).
- 753 [41] Abelson, S., et al. Prediction of acute myeloid leukaemia risk in healthy individuals. *Nature*, **559**,  
754 400–404 (2018).
- 755 [42] Biswas, D., et al. A clonal expression biomarker associates with lung cancer mortality. *Nat.*  
756 *Med.*, **25**, 1540–1548 (2019).
- 757 [43] Losic, B., et al. Intratumoral heterogeneity and clonal evolution in liver cancer. *Nat. Comm.*,  
758 **11**:291– (2020).



- 759 [44] Skead, K., et al. Interacting evolutionary pressures drive mutation dynamics and health outcomes  
760 in aging blood. *Nat. Comm.*, **12**, 4921– (2021).
- 761 [45] Pirzkall, A., et al. Tumor regrowth between surgery and initiation of adjuvant therapy in patients  
762 with newly diagnosed glioblastoma. *Neuro. Oncol.*, **11**, 842–852 (2009).
- 763 [46] Okolie, O., et al. Reactive astrocytes potentiate tumor aggressiveness in a murine glioma  
764 resection and recurrence model. *Neuro. Oncol.*, **18**, 1622–1633 (2016).
- 765 [47] Monteiro, A. R., Hill, R., Pilkington, G. J., and Madureira, P. A. The role of hypoxia in  
766 glioblastoma invasion. *Cells*, **6**, 45 (2017).
- 767 [48] Sabelström, H., et al. High density is a property of slow-cycling and treatment-resistant human  
768 glioblastoma cells. *Exp. Cell Res.* **378**, 76–86 (2019).
- 769 [49] Scott, J. N., et al. Which glioblastoma multiforme patient will become a long-term survivor? a  
770 population-based study. *Ann. Neurol.*, **46**, 183–188 (1999).
- 771 [50] Bozic, I., Gerold, J. M., and Nowak, M. A. Quantifying clonal and subclonal passenger  
772 mutations in cancer evolution. *PLoS Comput. Biol.*, **12**, e1004731 (2013).
- 773 [51] Ohtsuki, H., and H, I. Forward and backward evolutionary processes and allele frequency  
774 spectrum in a cancer cell population. *Theor. Popul. Biol.*, **117**, 43–50 (2017).
- 775 [52] Chen, Y., Tong, D., and Wu, C.-I. A new formulation of random genetic drift and its application  
776 to the evolution of cell populations. *Mol. Biol. Evol.*, **34**, 2057–2064 (2017).
- 777 [53] Peischl, S., Kirkpatrick, M., and Excoffier, L. Expansion load and the evolutionary dynamics of  
778 a species range. *Am. Nat.*, **185**, E81–E93 (2015).
- 779 [54] Rubanova, Y., et al. Reconstructing evolutionary trajectories of mutation signature activities in  
780 cancer using tracksig. *Nat. Comm.*, **11**, 731– (2020).
- 781 [55] DeWitt, W. S., Harris, K. D., Ragsdale, A. P., and Harris, K. Nonparametric coalescent inference  
782 of mutation spectrum history and demography. *PNAS*, **118**, e2013798118 (2021).
- 783 [56] Kondo, A., Safaei, R., Mishima, M., Niedner, H., Lin, X., and Howell, S. B. Hypoxia-induced  
784 enrichment and mutagenesis of cells that have lost dna mismatch repair. *Cancer Res.* **61**, 7603,  
785 (2001).
- 786 [57] R Core Team. *R: A Language and Environment for Statistical Computing* (R Foundation for  
787 Statistical Computing, Vienna, Austria, 2018).

788 [58] Van Rossum, G., and Drake Jr, F. L. *Python reference manual* (Centrum voor Wiskunde en  
789 Informatica Amsterdam, 1995).  
790
